# Supplementary material for: Reactive stroma component COL6A1 is upregulated in castration-resistant prostate cancer and promotes tumor growth
Source: PubMed Central journal article supplement (PMC4546481; doi:10.18632/oncotarget.3697), 2015-03-30
Supplement: oncotarget-06-14488-s001.pdf [file oncotarget-06-14488-s001.pdf]

## Reactive stroma component COL6A1 is upregulated in castration-resistant prostate cancer and promotes tumor growth

### Supplementary Material

Table S1, The sequences of shRNAs targeting COL6A1.

| Primer         | Direction | Sequence (5'-3')                                                |
|----------------|-----------|-----------------------------------------------------------------|
| shCOL6<br>A1-1 | Forward   | CCGGGTGGGCATCAAAGACGTGTTTCTCGAGAAACA<br>CGTCTTTGATGCCCACTTTTTG  |
|                | Reverse   | AATTCAAAAAGTGGGCATCAAAGACGTGTTTCTCGA<br>GAAACACGTCTTTGATGCCAC   |
| shCOL6<br>A1-2 | Forward   | CCGGCAAAGTCAAGTCCTTCACCAACTCGAGTTGGT<br>GAAGGACTTGACTTTGTTTTG   |
|                | Reverse   | AATTCAAAAACAAAGTCAAGTCCTTCACCAACTCGA<br>GTTGGTGAAGGACTTGACTTTG  |
| shCOL6<br>A1C3 | Forward   | CCGGGCTGTGTCTTACTAGAAACAACCTCGAGTTGTT<br>TCTAGTAAGACACAGCTTTTTG |
|                | Reverse   | AATTCAAAAAGCTGTGTCTTACTAGAAACAACCTCGA<br>GTTGTTTCTAGTAAGACACAGC |
